# Supplementary material for: Selenium Speciation in Se-Enriched Soybean Grains from Biofortified Plants Grown under Different Methods of Selenium Application
Source: MDPI journal article supplement (doi:10.3390/foods12061214), 2023-03-13
Supplement: s1 [file foods-2212022-supplementary.pdf › foods-2212022-supplementary.pdf]

## Supplementary Material

Table S1: Means (% of Se species) and Tukey test for Se species.

| Abbreviation | SeMet     | SeCys    | MetSeCys | Selenite | Selenate |
|--------------|-----------|----------|----------|----------|----------|
| L-Cnt        | 54.00 abc | 17.00 a  | 2.38 a   | 0.87 a   | 23.88 ab |
| LF-In10      | 81.00 abc | 4.09 bc  | 0.90 a   | 1.23 a   | 12.00 ab |
| LF-In80      | 94.10 a   | 1.29 d   | 0.53 a   | 2.34 a   | 1.10 b   |
| LF-Or10      | 75.50 bc  | 11.25 ab | 0.35 a   | 0.89 a   | 10.57 a  |
| LS-C80       | 92.40 a   | 1.49 cd  | 0.18 a   | 1.24 a   | 4.00 b   |
| LS-E80       | 90.80 a   | 1.51 cd  | 0.10 a   | 1.10 a   | 5.95 ab  |
| M-Cnt        | 73.50 c   | 7.86 ab  | 1.50 a   | 0.00 b   | 16.98 ab |
| MF-In10      | 91.60 a   | 1.24 d   | 0.63 a   | 1.52 a   | 4.55 ab  |
| MF-In80      | 90.20 a   | 1.20 d   | 2.93 a   | 2.18 a   | 3.15 b   |
| MF-Or10      | 89.40 ab  | 2.38 cd  | 0.95 a   | 1.00 a   | 5.95 ab  |
| MS-C80       | 92.4 a    | 1.02 d   | 0.20 a   | 0.65 ab  | 5.05 ab  |
| MS-E80       | 90.0 a    | 0.97 d   | 0.63 a   | 1.37 a   | 6.67 ab  |

Letters compare Se species among the treatments. Different letters in the same column indicate significant differences in Tukey test results.

Table S2: Correlation coefficients among Se species in soybean grains.

| Variables | SeCys               | MeSeCys             | Selenite            | SeMet  | Selenate |
|-----------|---------------------|---------------------|---------------------|--------|----------|
| MeSeCys   | 0.07 <sup>ns</sup>  | -                   | -                   | -      | -        |
| Selenite  | -0.22 <sup>ns</sup> | -0.05 <sup>ns</sup> | -                   | -      | -        |
| SeMet     | -0.78*              | -0.41*              | 0.20 <sup>ns</sup>  | -      | -        |
| Selenate  | 0.52*               | 0.37*               | -0.28 <sup>ns</sup> | -0.92* | -        |
| Se-total  | -0.34*              | 0.16 <sup>ns</sup>  | 0.39*               | 0.34*  | -0.36*   |

<sup>ns</sup> non-significant correlation; \* Pearson's correlations significant.
